# Supplementary material for: Mitochondrial thioredoxin system is required for enhanced stress resistance and extended longevity in long-lived mitochondrial mutants
Source: PubMed Central journal article supplement — Redox Biol. 2022 May 13;53:102335. doi: 10.1016/j.redox.2022.102335 (PMC9126954; doi:10.1016/j.redox.2022.102335), 2022-05-13
Supplement: mmc1.pdf [file mmc1.pdf]

Supplementary Figures for:

## **Mitochondrial thioredoxin system is required for enhanced stress resistance and extended longevity in long-lived mitochondrial mutants**

Namasthéé Harris-Gauthier<sup>1,2</sup>, Annika Traa<sup>1,2\*</sup>, Abdelrahman AlOkda<sup>1,2\*</sup>, Alibek Moldakozhayev<sup>1,2\*</sup>, Ulrich Anglas<sup>1,2\*</sup>, Sonja K. Soo<sup>1,2\*</sup>, Jeremy M. Van Raamsdonk<sup>1,2,3,4</sup>

<sup>1</sup>Department of Neurology and Neurosurgery, McGill University, Montreal, Quebec, Canada

<sup>2</sup>Metabolic Disorders and Complications Program, and Brain Repair and Integrative Neuroscience Program, Research Institute of the McGill University Health Centre, Montreal, Quebec, Canada

<sup>3</sup>Division of Experimental Medicine, Department of Medicine, McGill University, Montreal, Quebec, Canada

<sup>4</sup>Department of Genetics, Harvard Medical School, Boston, MA, USA

\*these authors contributed equally to this work

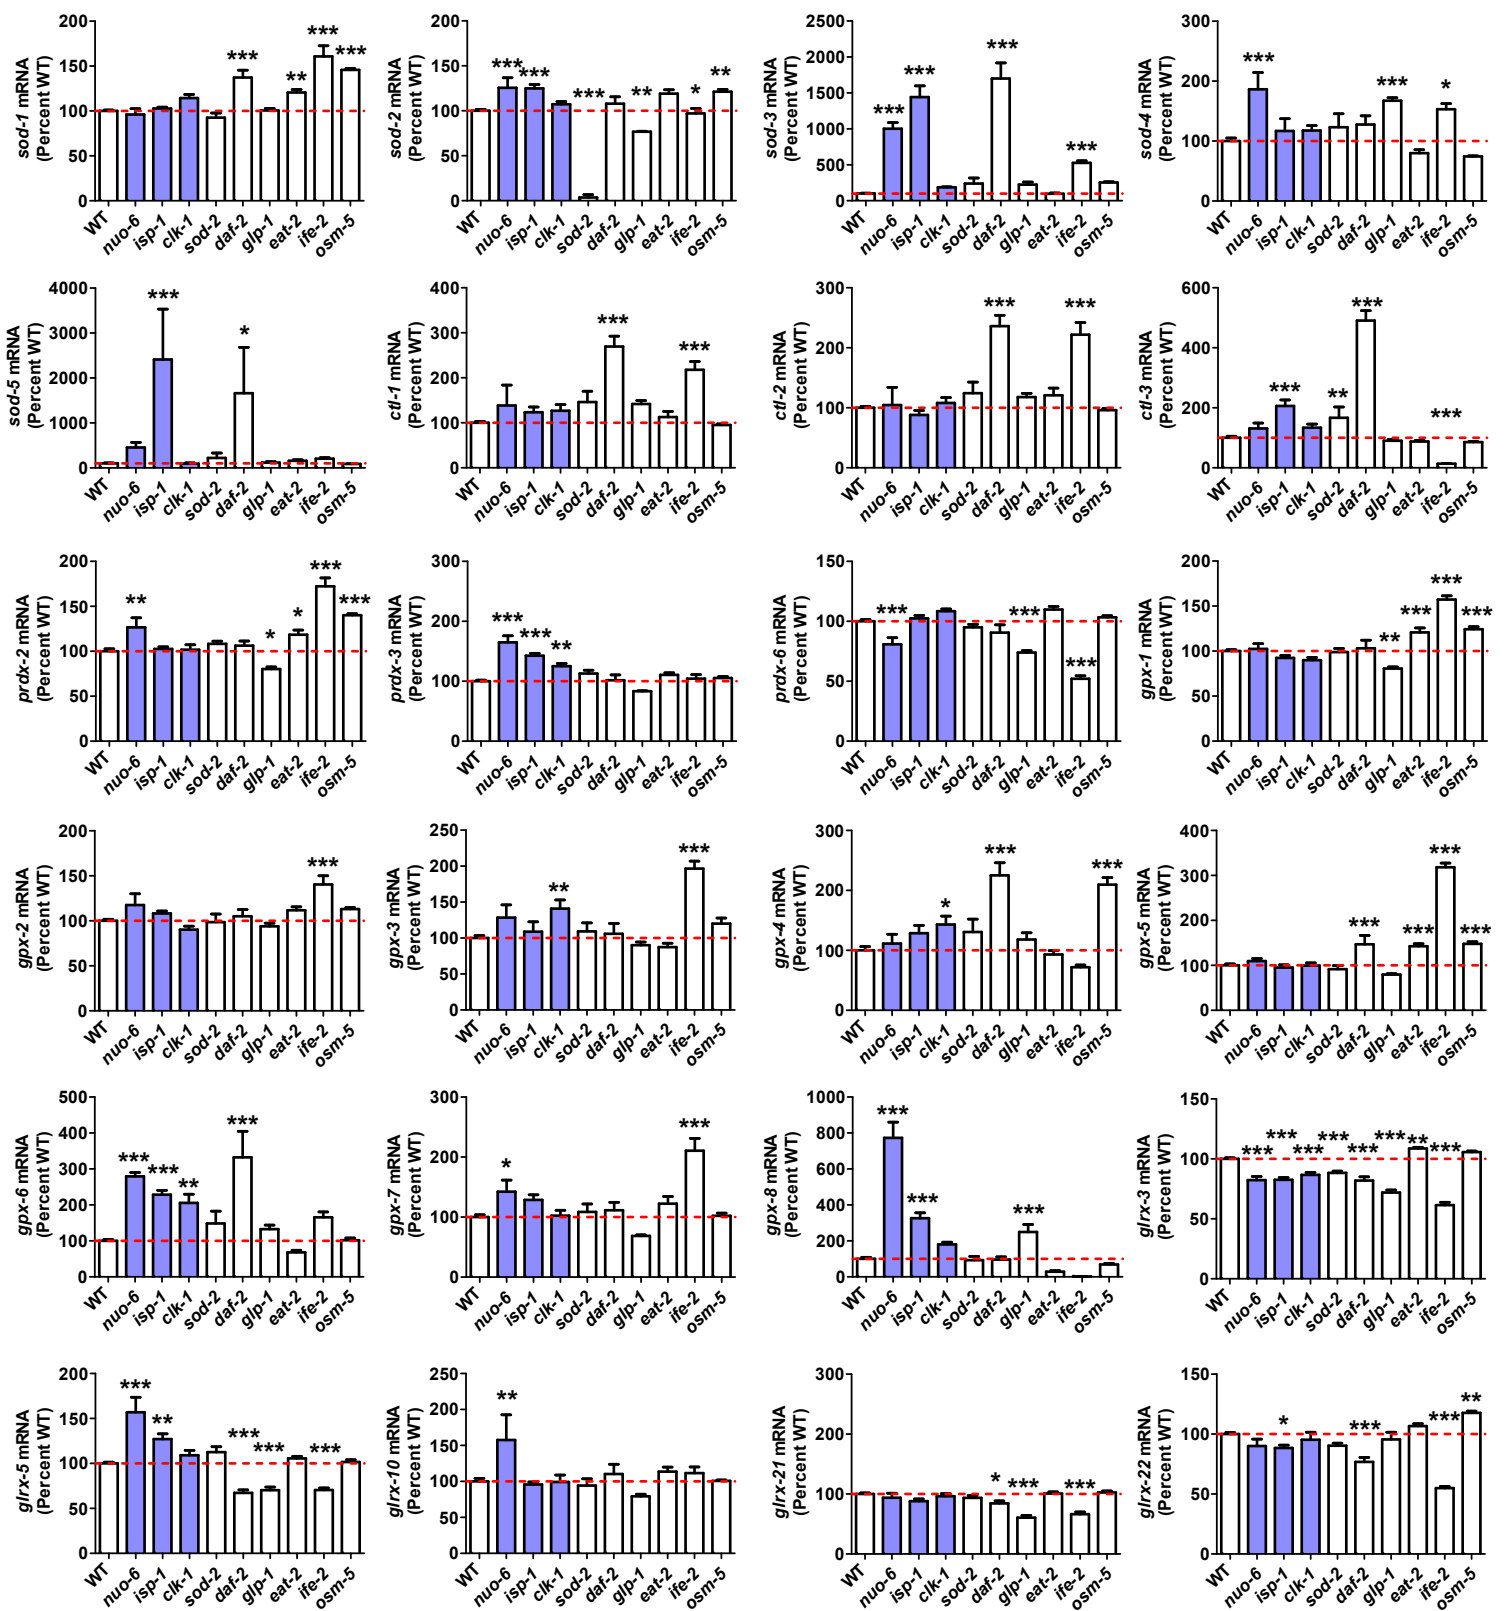

**Fig. S1. *prdx-3* is specifically upregulated in long-lived mitochondrial mutants.** To determine which antioxidant genes are specifically upregulated in long-lived mitochondrial mutants, we quantified gene expression from RNA sequencing data of six biological replicates per strain. Expression of *prdx-3* was specifically upregulated in the long-lived mitochondrial mutants *nuo-6*, *isp-1* and *clk-1*, but not in other long-lived strains. Statistical significance was assessed using a one-way ANOVA with Dunnett's multiple comparison test. Error bars indicate SEM. \* $p < 0.05$ , \*\* $p < 0.01$ , \*\*\* $p < 0.001$ .

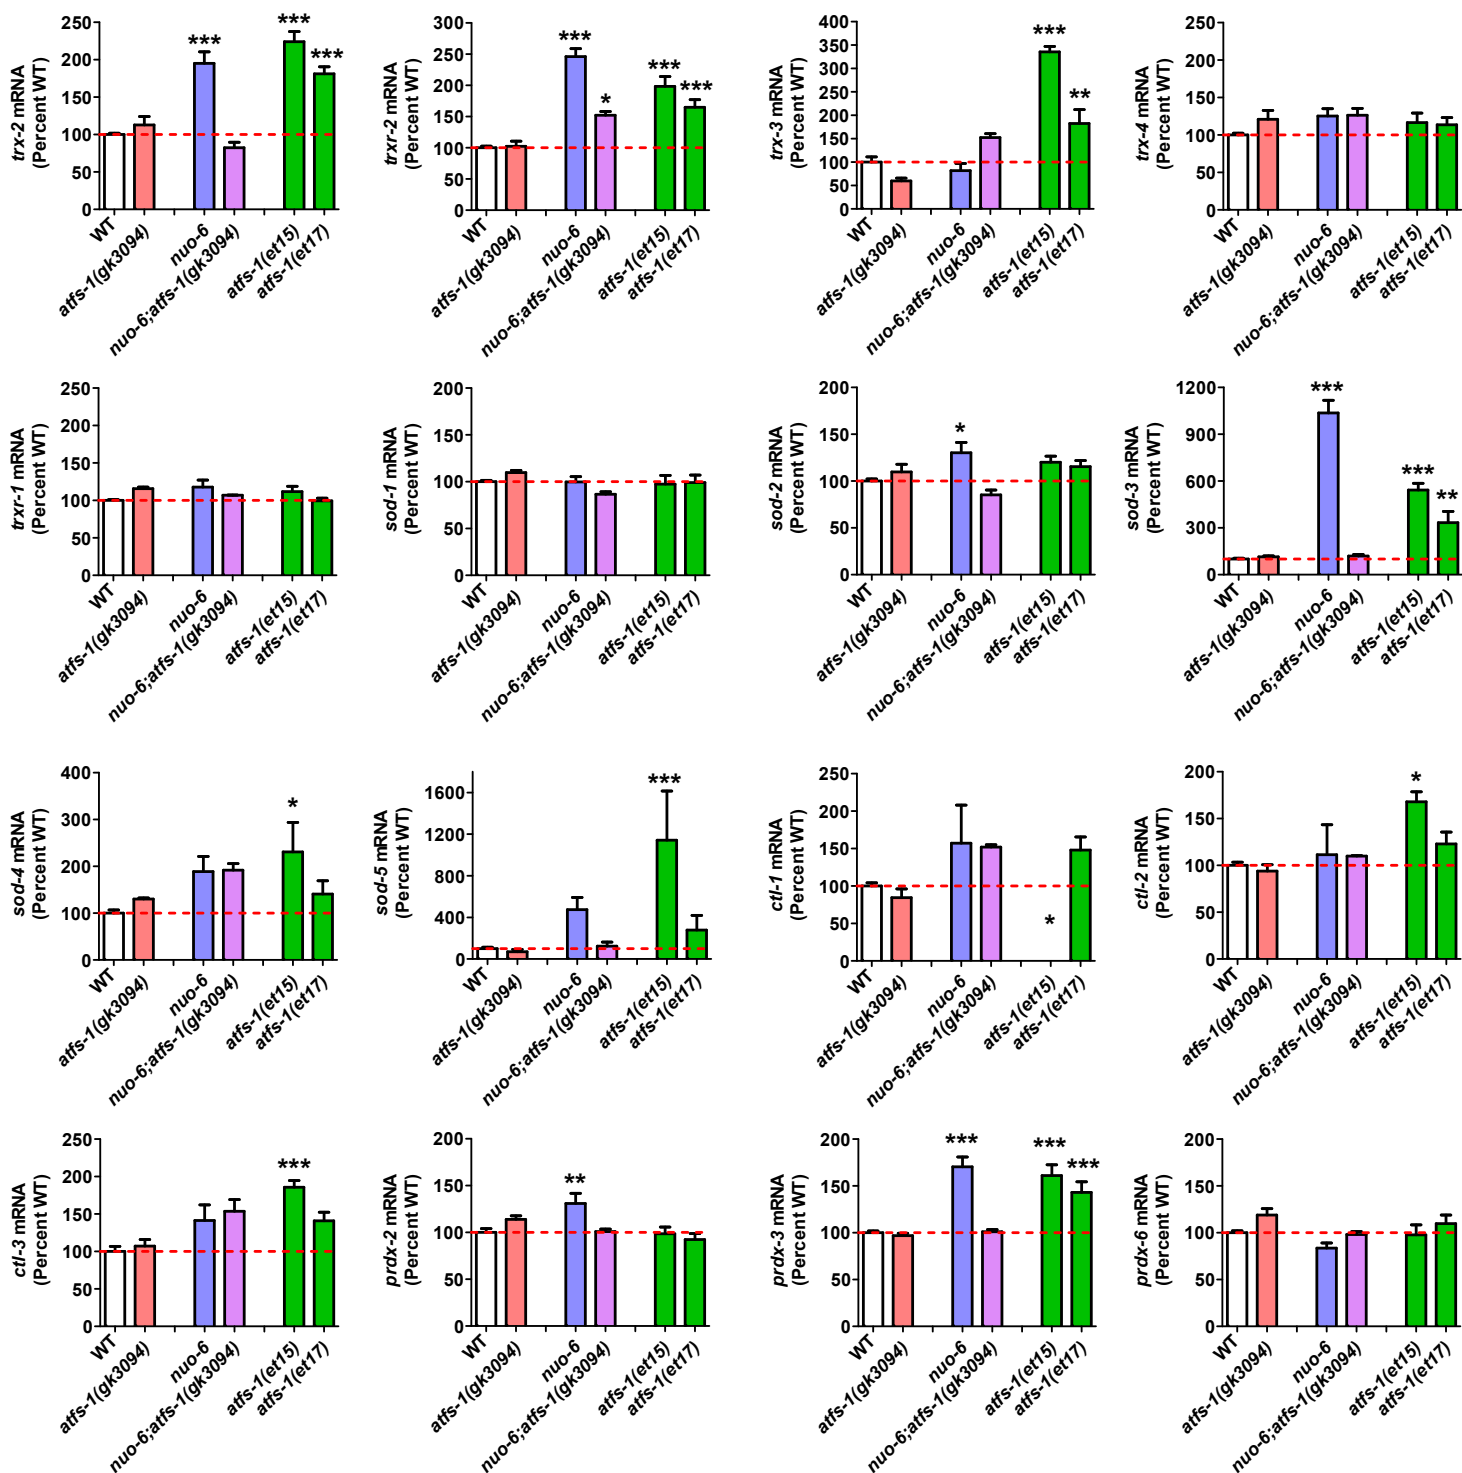

**Fig. S2. Activation of mitoUPR results in upregulation of *sod-3* and *prdx-3*.** To examine the role of the mitochondrial unfolded protein response (mitoUPR) in the upregulation or expression of antioxidant genes, we examined antioxidant gene expression in wild-type, *atfs-1(gk3094)* deletion mutants, *nuo-6* mutants, *nuo-6;atfs-1* mutants, and two constitutively active *atfs-1* mutants, *et15* and *et17*. Similar to *trx-2* and *trxr-2*, both *sod-3* and *prdx-3* showed ATFS-1-dependent upregulation in *nuo-6* worms and upregulation in both constitutively active *atfs-1* mutants. Gene expression was measured using RNA sequencing with 3-6 biological replicates per strain. Statistical significance was assessed using a one-way ANOVA with Dunnett's multiple comparison test and indicates the difference from wild-type. Error bars indicate SEM. \* $p < 0.05$ , \*\* $p < 0.01$ , \*\*\* $p < 0.001$ .

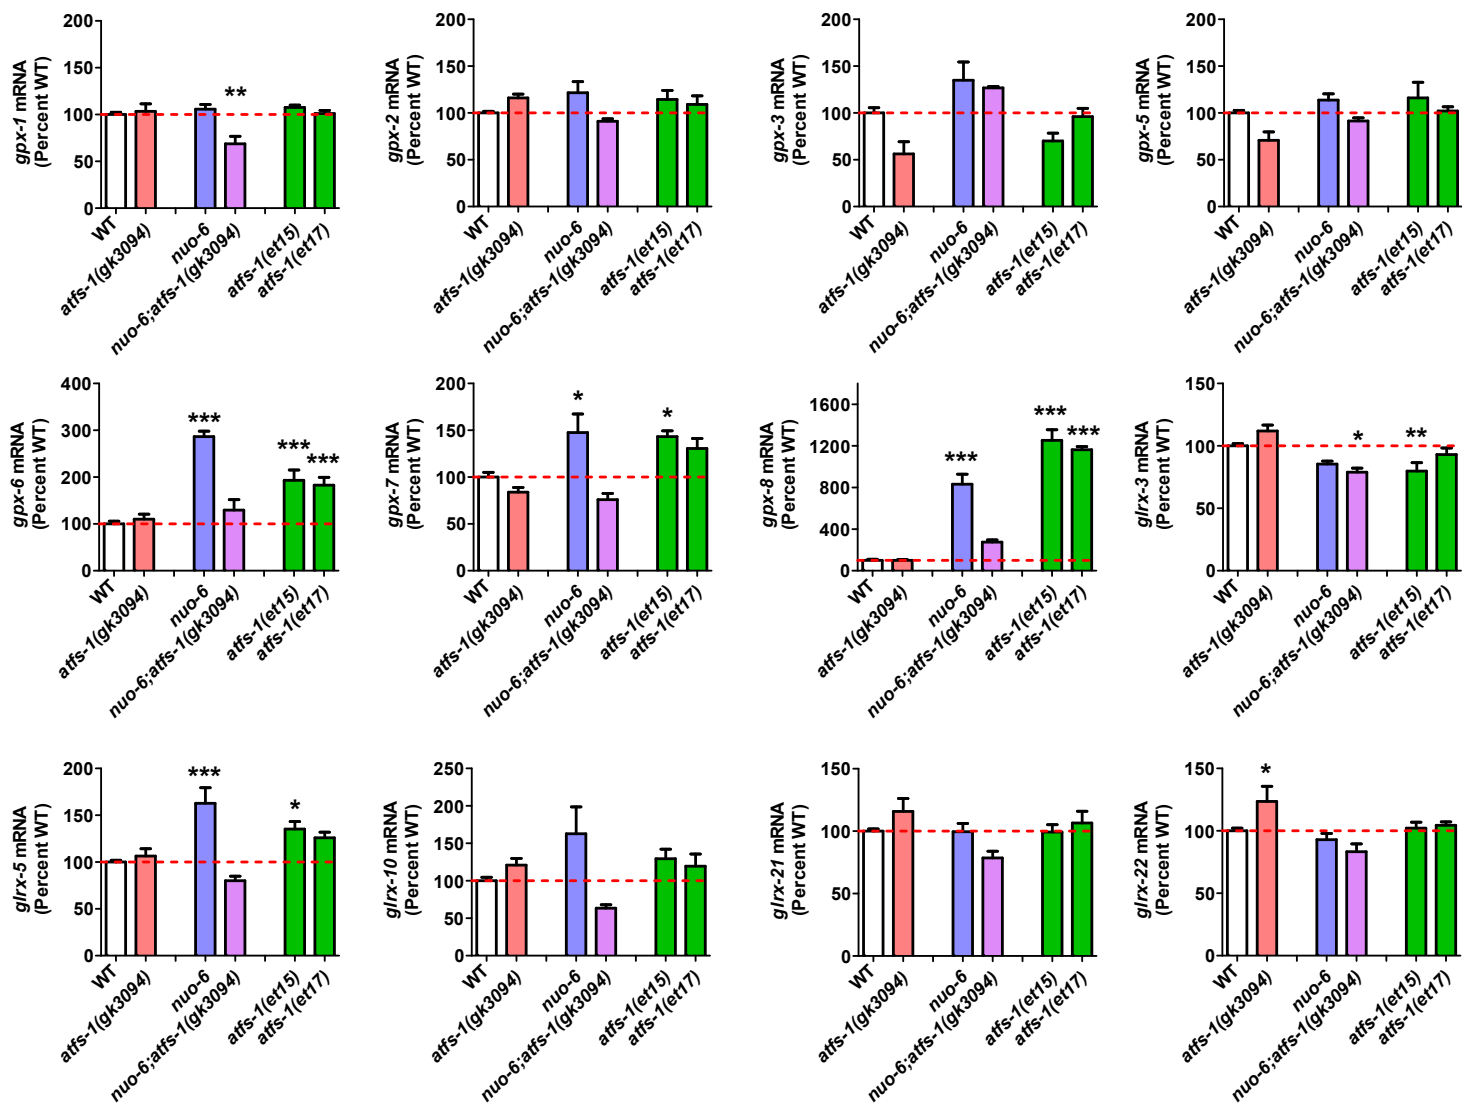

**Fig. S3. Activation of mitoUPR results in upregulation of *gpx-6* and *gpx-8*.** To examine the role of the mitochondrial unfolded protein response (mitoUPR) in the upregulation or expression of antioxidant genes, we examined antioxidant gene expression in wild-type, *atfs-1(gk3094)* deletion mutants, *nuo-6* mutants, *nuo-6;atfs-1* mutants, and two constitutively active *atfs-1* mutants, *et15* and *et17*. Similar to *trx-2* and *txr-2*, both *gpx-6* and *gpx-8* showed ATFS-1-dependent upregulation in *nuo-6* worms and upregulation in both constitutively active *atfs-1* mutants. Gene expression was measured using RNA sequencing with 3-6 biological replicates per strain. Statistical significance was assessed using a one-way ANOVA with Dunnett's multiple comparison test and indicates the difference from wild-type. Error bars indicate SEM. \* $p < 0.05$ , \*\* $p < 0.01$ , \*\*\* $p < 0.001$ .

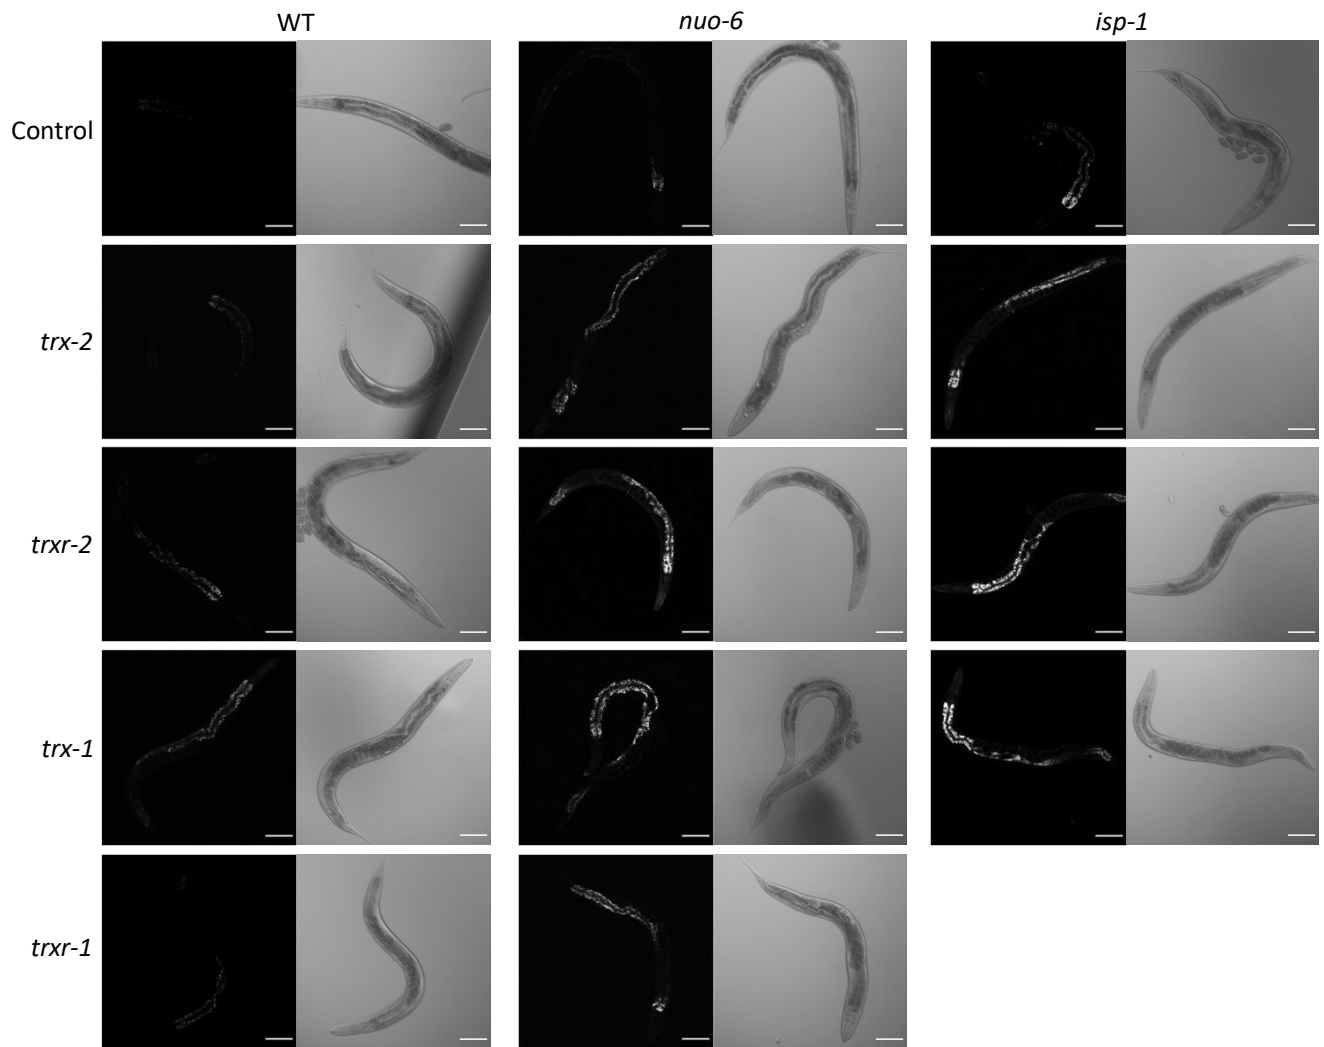

**Fig. S4. Disruption of mitochondrial or cytoplasmic thioredoxin systems increases levels of reactive oxygen species.** ROS levels were measured by staining whole worms with dihydroethidium (DHE) and quantifying the resulting fluorescence. Representative images of each genotype are shown. Scale bar indicates 100  $\mu$ M. Quantification of fluorescence can be found in **Figure 3**.

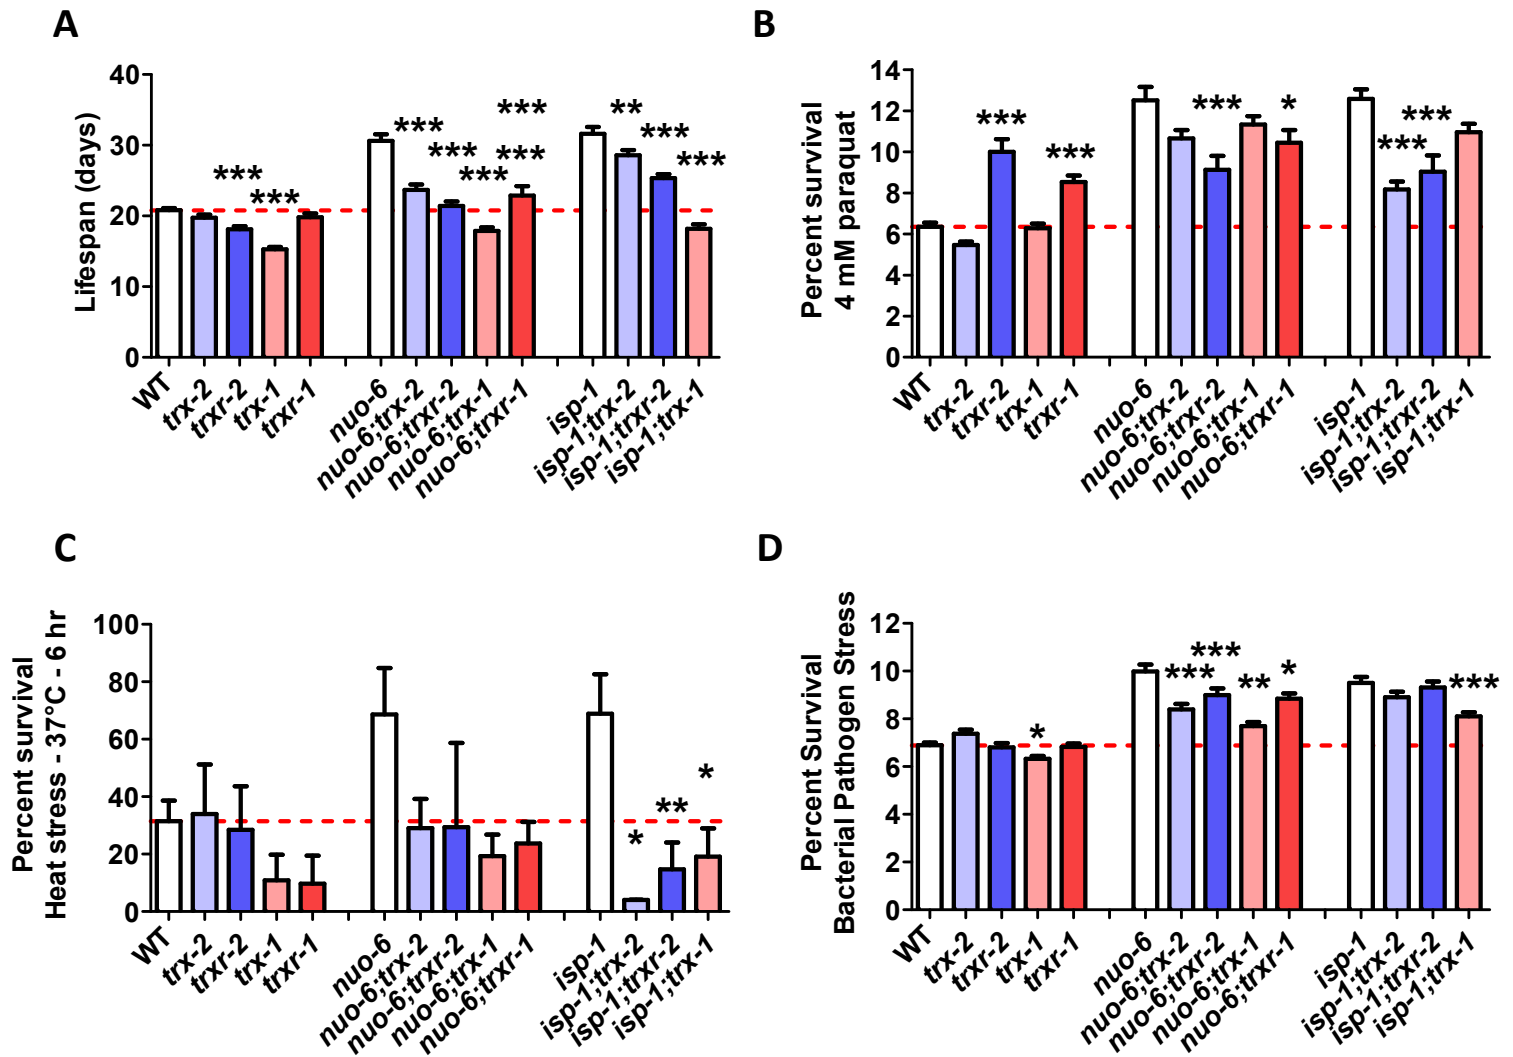

**Fig. S5. Disruption of thioredoxin system genes affects lifespan and resistance to stress.** Data from figures 4 (A; lifespan), figure 5 (B; oxidative stress resistance), figure 6 (C; heat stress) and figure 8 (D; bacterial pathogen resistance) were reformatted into a bar graph to facilitate comparisons across all genotypes. Raw data can be found in **Table S1**. Statistical significance was assessed using a one-way ANOVA with Dunnett's multiple comparison test. Error bars indicates SEM. \* $p < 0.05$ , \*\* $p < 0.01$ , \*\*\* $p < 0.001$ .

**Table S2. Summary of results**

“=” indicates no significant difference, one arrow indicates less than 15% change; two arrows indicates 15-30% change; three arrows indicates greater than 30% change

|              |                               | <i>trx-2</i> | <i>trxr-2</i> | <i>trx-1</i> | <i>trxr-1</i> |
|--------------|-------------------------------|--------------|---------------|--------------|---------------|
| Wild-type    | ROS levels                    | ↑↑           | ↑↑↑           | ↑↑↑          | ↑↑            |
|              | Lifespan                      | =            | ↓             | ↓↓           | =             |
|              | Oxidative Stress Resistance   | ↓            | ↑↑↑           | =            | ↑↑↑           |
|              | Heat Stress Resistance        | =            | =             | ↓↓↓          | ↓↓↓           |
|              | Bacterial pathogen resistance | ↑            | =             | ↓            | =             |
|              | Osmotic stress resistance     | =            | =             | ↓↓↓          | =             |
| <i>nuo-6</i> | ROS levels                    | ↑↑↑          | ↑↑↑           | ↑↑↑          | ↑↑↑           |
|              | Lifespan                      | ↓↓           | ↓↓            | ↓↓↓          | ↓↓            |
|              | Oxidative Stress Resistance   | ↓            | ↓↓            | ↓            | ↓↓            |
|              | Heat Stress Resistance        | ↓↓↓          | ↓↓↓           | ↓↓↓          | ↓↓↓           |
|              | Bacterial pathogen resistance | ↓↓           | ↓             | ↓↓           | ↓             |
|              | Osmotic stress resistance     | =            | ↓↓↓           | ↓↓           | =             |
| <i>isp-1</i> | ROS levels                    | ↑↑↑          | ↑↑↑           | ↑↑↑          | NA            |
|              | Lifespan                      | ↓            | ↓↓            | ↓↓↓          | NA            |
|              | Oxidative Stress Resistance   | ↓↓↓          | ↓↓↓           | ↓            | NA            |
|              | Heat Stress Resistance        | ↓↓↓          | ↓↓↓           | ↓↓↓          | NA            |
|              | Bacterial pathogen resistance | =            | =             | ↓            | NA            |
|              | Osmotic stress resistance     | ↓↓↓          | ↓↓↓           | ↓↓↓          | NA            |
